# Supplementary material for: Prevalence evolution of SARS-CoV-2 infection in the Municipality of São Paulo, 2020 - 2021
Source: bioRxiv or medRxiv preprint supplement (doi:10.1101/2021.06.16.21256530), 2021-06-20
Supplement: Supplementary file [file media-1.pdf]

Table S1. Number of Primary Healthcare Units (PHU), initial and increased sample size by region. Municipality of São Paulo, 2020.

| Region                    | Number of PHU | Initial sample size | Increased sample size to compensate for the non-response (50%) |
|---------------------------|---------------|---------------------|----------------------------------------------------------------|
| Central-West              | 40            | 400                 | 600                                                            |
| North                     | 94            | 752                 | 1,128                                                          |
| South                     | 124           | 992                 | 1,488                                                          |
| Southeast                 | 95            | 760                 | 1,140                                                          |
| East                      | 118           | 944                 | 1,416                                                          |
| Municipality of São Paulo | 471           | 3,848               | 5,772                                                          |

Table S2. Reasons for non-response of selected dwellings. Municipality of São Paulo, 2021.

| Study phase | Address not found |      | Closed property |      | Individual's refuse |      | Absence of selected individual |      | Vaccinated individual (COVID-19) |     | Other reasons |      | Total  |
|-------------|-------------------|------|-----------------|------|---------------------|------|--------------------------------|------|----------------------------------|-----|---------------|------|--------|
|             | N                 | %    | N               | %    | N                   | %    | N                              | %    | N                                | %   | N             | %    |        |
| Phase 1     | 1,234             | 39.7 | 403             | 13.0 | 774                 | 24.9 | 272                            | 8.8  | -                                | -   | 422           | 13.6 | 3,105  |
| Phase 2     | 1,288             | 37.9 | 433             | 12.7 | 829                 | 24.4 | 380                            | 11.2 | -                                | -   | 470           | 13.8 | 3,400  |
| Phase 3     | 1,005             | 31.7 | 533             | 16.8 | 843                 | 26.6 | 425                            | 13.4 | -                                | -   | 365           | 11.5 | 3,171  |
| Phase 4     | 933               | 28.3 | 529             | 16.1 | 877                 | 26.6 | 584                            | 17.7 | -                                | -   | 371           | 11.3 | 3,294  |
| Phase 5     | 901               | 26.1 | 616             | 17.8 | 919                 | 26.6 | 624                            | 18.1 | -                                | -   | 392           | 11.4 | 3,452  |
| Phase 6     | 960               | 26.7 | 583             | 16.2 | 983                 | 27.3 | 667                            | 18.5 | -                                | -   | 404           | 11.2 | 3,597  |
| Phase 7     | 962               | 26.1 | 644             | 17.5 | 1,038               | 28.1 | 684                            | 18.5 | -                                | -   | 360           | 9.8  | 3,688  |
| Phase 8     | 922               | 25.0 | 650             | 17.6 | 958                 | 26.0 | 628                            | 17.0 | -                                | -   | 533           | 14.4 | 3,691  |
| Phase 9     | 995               | 25.6 | 676             | 17.4 | 1,071               | 27.6 | 687                            | 17.7 | -                                | -   | 455           | 11.7 | 3,884  |
| Phase 10    | 1,129             | 28.4 | 692             | 17.4 | 1,072               | 27.0 | 762                            | 19.2 | 10                               | 0.3 | 312           | 7.8  | 3,977  |
| Phase 11    | 1,033             | 26.4 | 730             | 18.7 | 1,079               | 27.6 | 723                            | 18.5 | 25                               | 0.6 | 320           | 8.2  | 3,910  |
| Total       | 11,362            | 29.0 | 6,489           | 16.6 | 10,443              | 26.7 | 6,436                          | 16.4 | 35                               | 0.1 | 4,404         | 11.2 | 39,169 |
